# Supplementary material for: Predictive Factors for BRCA1 and BRCA2 Genetic Testing in an Asian Clinic-Based Population
Source: PLoS One. 2015 Jul 29;10(7):e0134408. doi: 10.1371/journal.pone.0134408 (PMC4519264; doi:10.1371/journal.pone.0134408)
Supplement: S3 Table — Ca, Cancer; C, Chinese; M, Malay; BC, Breast Cancer; OC, Ovarian Cancer; IDC, Invasive Ductal Carcinoma; ILC, Invasive Lobular Carcinoma; DCIS, Ductal Carcinoma in situ; HR, Hormone Receptor; ER, Estrogen Receptor; PR, Progesterone Receptor; TNBC, Triple Negative Breast Cancer; Unk, Unknown; Ref, References; OS, Overall Scores for the prediction of damaging mutations; D, Damaging; P, Potential damaging; N, Neutral. (XLSX) [file pone.0134408.s005.xlsx]

## Sheet: Sheet1
S3 Table . Damaging missense mutations in the BRCA1 and BRCA2 genes
Damaging Missense mutations in BRCA1 and BRCA2 gene
											Prediction/Score of functional effect of missense mutations
ID	Age at Diagnosis	Race	Proband’s Ca Type	HR	Family History	Exon	Genomic Position	dbSNP	Variant	Ref	SIFT	HDIV	HVAR	LRT	Mutation Taster	OS
BRCA1 (NM_007294)
BR59	36	C	BC	IDC Unk	Early Onset	11	41245815		c.1733C>T;p.S578F		0.01/D	1/D	0.96/D	0.0483/N	0.0414/N	3
FH83	39	C	BC&OC	AMC ER- PR+ HER2-	Sisters BC	17	41219627	rs80357034	c.5072C>A;p.T1691K		0/D	1/D	0.999/D	0/D	0.990086/D	3
59	55	C	BC	IDC+ILC ER+ PR+ HER2+	Sisters OC	5	41258513		c.172C>G; p.P58A	[13]	0.02/D	0.996/D	0.981/D	0.0039/N	0.218417/N	3
104	33	C	BC	IDC ER+ PR+ HER2-	Mother, Sister BC	17	41219631		c.5068A>C;p.K1690Q	[13]	0/D	0.997/D	0.972/D	0.0012/N	0.147283/N	3
BRCA2 (NM_000059)
FH87;MR27	32;36	C;C	BC;BC	IDC ER+ PR+ HER2-; IDC ER- PR- HER2- TNBC	Mother BC; Aunts BC	6	32900386		c.483T>G; p.C161W	[13]	0.04/D	0.999/D	0.974/D	0.0007/N	0.046797/N	3
YP16	38	C	BC	IDC ER+ PR+ HER2-	Early Onset	13	32921012	rs80358925	c.6986C>T; p.P2329L		0/D	0.999/D	0.773/P	0/D	0.87994/D	4
99	42	C	BC	IDC ER- PR- HER2- TNBC	Mother, Aunts BC	15	32930651	rs80358978	c.7522G>A; p.G2508S		0.05/D	1/D	1/D	0/D	0.954708/D	4
HR45	28	M	BC	IDC ER+ PR- HER2-	EO & Mother BC	16	32931892		c.7631G>A; p.G2544D	[13]	0.04/D	1/D	1/D	0/D	0.976257/D	5
FH15	44	C	BC	IDC ER+ PR+ HER2-	Mother BC	19	32944563	rs80359077	c.8356G>A; p.A2786T		0.01/D	0.998/D	0.844/P	0.0005/N	0.761213/D	3
BR88	38	C	BC	DCIS ER+ PR+ Unk	Early Onset	21	32950876	rs80359129	c.8702G>A; p.G2901D		0.01/D	1/D	0.999/D	0/D	0.946475/D	5
YP55	38	C	BC	IDC ER+ PR+ HER2+	Early Onset	24	32954180	rs45580035	c.9454C>T; p.R3052W		0/D	1/D	1/D	0/D	0.942539/D	5
